# Supplementary material for: Metabolic Dysfunction-Associated Fatty Liver Disease and Mortality: A Population-Based Cohort Study
Source: PubMed Central journal article supplement — Diabetes Metab J. 2023 Jan 12;47(2):220–31. doi: 10.4093/dmj.2021.0327 (PMC10040627; doi:10.4093/dmj.2021.0327), 2023-01-12
Supplement: dmj-2021-0327-Supplementary-Fig-1.pdf [file dmj-2021-0327-Supplementary-Fig-1.pdf]

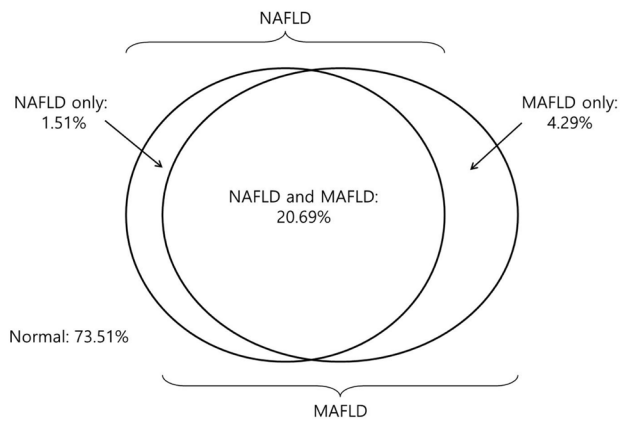

**Supplementary Fig. 1.** Relative proportions of metabolic dysfunction-associated fatty liver disease (MAFLD) and nonalcoholic fatty liver disease (NAFLD). Diagram is not drawn to scale.
