# Supplementary material for: Metabolic Dysfunction-Associated Fatty Liver Disease and Mortality: A Population-Based Cohort Study
Source: PubMed Central journal article supplement — Diabetes Metab J. 2023 Jan 12;47(2):220–31. doi: 10.4093/dmj.2021.0327 (PMC10040627; doi:10.4093/dmj.2021.0327), 2023-01-12
Supplement: dmj-2021-0327-Supplementary-Table-1.pdf [file dmj-2021-0327-Supplementary-Table-1.pdf]

Supplementary Table 1. Baseline subject characteristics according to sex

| Variable                           | Normal         |                | NAFLD only    |              | MAFLD only    |              | NAFLD and MAFLD |               |
|------------------------------------|----------------|----------------|---------------|--------------|---------------|--------------|-----------------|---------------|
|                                    | Men            | Women          | Men           | Women        | Men           | Women        | Men             | Women         |
| Number                             | 134,890        | 155,317        | 4,098         | 1,881        | 15,728        | 1,224        | 61,395          | 20,302        |
| Age, yr                            | 38.94±9.87     | 38.67±9.77     | 37.76±8.64    | 41.16±9.83   | 41.39±9.12    | 46.31±11.30  | 39.84±9.60      | 48.34±11.69   |
| Body mass index, kg/m <sup>2</sup> | 23.34±2.49     | 21.63±2.67     | 21.87±1.09    | 21.49±1.12   | 26.67±2.65    | 26.86±3.31   | 26.33±2.51      | 26.23±3.04    |
| Waist circumference, cm            | 81.94±6.90     | 73.54±7.33     | 79.94±4.05    | 74.51±4.55   | 91.08±6.84    | 87.51±8.35   | 89.50±6.58      | 85.20±7.60    |
| Current smoker                     | 43.32 (58,428) | 4.64 (7,206)   | 38.63 (1,583) | 4.09 (77)    | 53.20 (8,367) | 11.19 (137)  | 41.67 (25,586)  | 3.40 (691)    |
| Daily alcohol consumption, g/day   | 16.24±20.60    | 3.35±8.99      | 7.95±7.36     | 2.08±3.64    | 46.82±32.53   | 22.78±29.27  | 9.43±7.94       | 1.67±3.37     |
| Regular physical activity          | 7.02 (9,476)   | 14.65 (22,756) | 5.95 (244)    | 14.57 (274)  | 7.77 (1,222)  | 16.18 (198)  | 7.26 (4,460)    | 15.86 (3,219) |
| Type 2 diabetes mellitus           | 3.02 (4,077)   | 1.60 (2,479)   | 0.00 (0)      | 0.00 (0)     | 13.17 (2,072) | 13.40 (164)  | 8.92 (5,476)    | 15.63 (3,174) |
| Hypertension                       | 16.12 (21,746) | 7.81 (12,123)  | 6.12 (251)    | 3.77 (71)    | 34.61 (5,443) | 31.62 (387)  | 26.49 (16,261)  | 33.46 (6,793) |
| Hypercholesterolemia               | 9.15 (12,340)  | 7.01 (10,887)  | 12.64 (518)   | 13.78 (259)  | 21.52 (3,385) | 19.12 (234)  | 19.16 (11,762)  | 22.84 (4,636) |
| History of cardiovascular disease  | 3.22 (4,338)   | 3.52 (5,471)   | 3.44 (141)    | 4.31 (81)    | 4.01 (630)    | 5.39 (66)    | 4.52 (2,774)    | 7.70 (1,563)  |
| HBsAg                              | 4.94 (6,664)   | 3.42 (5,311)   | 0             | 0            | 17.52 (2,755) | 45.10 (552)  | 0               | 0             |
| Anti-HCV                           | 0.22 (291)     | 0.24 (373)     | 0             | 0            | 0.66 (102)    | 5.10 (62)    | 0               | 0             |
| Systolic blood pressure, mm Hg     | 116.04±12.74   | 107.61±13.74   | 112.59±9.92   | 106.71±12.22 | 121.97±13.78  | 118.94±16.97 | 119.94±13.40    | 119.30±16.69  |
| Diastolic blood pressure, mm Hg    | 75.16±9.22     | 68.58±9.30     | 73.02±7.87    | 68.55±8.60   | 79.68±10.03   | 75.82±11.12  | 78.19±9.64      | 75.53±10.39   |
| Fasting plasma glucose, mg/dL      | 94.40±14.57    | 90.82±10.83    | 92.05±7.61    | 91.12±7.88   | 105.52±27.09  | 102.99±23.93 | 100.67±21.11    | 104.02±26.80  |
| HbA1c                              | 5.47±0.48      | 5.50±0.37      | 5.43±0.27     | 5.52±0.28    | 5.81±0.83     | 5.89±0.85    | 5.71±0.72       | 5.98±0.87     |
| Fasting serum insulin, µU/mL       | 3.95±3.86      | 4.29±2.81      | 4.21±2.20     | 4.81±2.61    | 6.93±4.72     | 8.04±5.28    | 6.75±6.50       | 7.43±6.38     |
| Total cholesterol, mg/dL           | 193.31±33.04   | 186.48±33.18   | 199.34±34.01  | 199.34±35.91 | 211.00±36.93  | 206.29±36.05 | 208.89±35.17    | 210.16±37.99  |
| Triglyceride, mg/dL                | 122.56±71.43   | 86.17±46.10    | 123.45±58.78  | 99.42±50.43  | 205.78±139.03 | 146.11±93.03 | 185.22±109.97   | 155.26±95.63  |
| HDL-cholesterol, mg/dL             | 54.31±11.79    | 62.10±13.50    | 52.51±9.69    | 61.14±13.00  | 50.22±10.78   | 56.05±13.79  | 47.59±9.30      | 52.65±11.24   |
| LDL-cholesterol, mg/dL             | 114.84±28.63   | 105.11±28.21   | 123.32±29.79  | 118.23±31.54 | 126.73±32.11  | 124.73±32.38 | 128.48±30.72    | 128.26±32.96  |
| Non-HDL-cholesterol, mg/dL         | 139.00±32.66   | 124.38±31.89   | 146.82±33.32  | 138.19±35.14 | 160.78±35.79  | 150.23±34.74 | 161.30±33.75    | 157.51±36.18  |
| Apolipoprotein A-I, mg/dL          | 139.29±22.88   | 147.26±24.23   | 137.56±19.93  | 148.09±23.74 | 138.26±23.56  | 144.92±26.48 | 132.11±20.35    | 139.10±23.41  |
| Apolipoprotein B, mg/dL            | 92.31±22.22    | 81.55±21.80    | 97.34±22.85   | 91.38±24.43  | 107.90±23.63  | 101.98±24.56 | 107.77±23.17    | 106.58±25.18  |
| Aspartate aminotransferase, U/L    | 24.70±29.85    | 20.64±10.23    | 24.95±11.73   | 22.20±13.55  | 32.97±19.49   | 28.93±21.97  | 29.35±13.49     | 25.64±13.94   |
| Alanine aminotransferase, U/L      | 25.93±32.37    | 16.99±13.74    | 30.31±17.73   | 20.75±13.31  | 43.26±30.29   | 31.17±27.99  | 42.45±26.81     | 28.34±20.49   |
| Gamma-glutamyl transferase, U/L    | 34.86±40.68    | 14.89±15.83    | 33.86±37.34   | 20.91±43.29  | 80.66±91.51   | 40.39±156.15 | 48.86±43.47     | 27.18±37.84   |
| Creatinine, mg/dL                  | 1.08±0.19      | 0.81±0.15      | 1.06±0.13     | 0.79±0.13    | 1.06±0.17     | 0.79±0.15    | 1.10±0.14       | 0.83±0.15     |
| C-reactive protein, mg/dL          | 0.12±0.34      | 0.09±0.27      | 0.11±0.23     | 0.10±0.21    | 0.16±0.32     | 0.20±0.48    | 0.16±0.33       | 0.18±0.34     |
| HOMA-IR                            | 0.93±0.78      | 0.98±0.70      | 0.96±0.52     | 1.09±0.61    | 1.82±1.37     | 2.07±1.50    | 1.69±1.58       | 1.93±1.93     |

Values are presented as mean±standard deviation or percentage (number).

NAFLD, nonalcoholic fatty liver disease; MAFLD, metabolic dysfunction-associated fatty liver disease; HBsAg, hepatitis B surface antigen; HCV, hepatitis C virus; HbA1c, glycosylated hemoglobin; HDL, high density lipoprotein; LDL, low density lipoprotein; HOMA-IR, homeostasis model assessment of insulin resistance.
