# Supplementary material for: Metabolic Dysfunction-Associated Fatty Liver Disease and Mortality: A Population-Based Cohort Study
Source: PubMed Central journal article supplement — Diabetes Metab J. 2023 Jan 12;47(2):220–31. doi: 10.4093/dmj.2021.0327 (PMC10040627; doi:10.4093/dmj.2021.0327), 2023-01-12
Supplement: dmj-2021-0327-Supplementary-Table-2.pdf [file dmj-2021-0327-Supplementary-Table-2.pdf]

**Supplementary Table 2.** The risk of all-cause death according to the component of metabolic dysfunction-associated fatty liver disease

| Variable                               | Normal    | Obesity<br>(BMI $\geq$ 23 kg/m <sup>2</sup> ) | Type 2 diabetes mellitus | Lean with metabolic dysfunction |
|----------------------------------------|-----------|-----------------------------------------------|--------------------------|---------------------------------|
| <b>All</b>                             |           |                                               |                          |                                 |
| Crude HR                               | 1.0 (ref) | 0.95 (0.84–1.07)                              | 1.09 (0.75–1.60)         | 1.03 (0.77–1.39)                |
| Age-adjusted HR                        | 1.0 (ref) | 0.96 (0.85–1.08)                              | 1.00 (0.68–1.46)         | 0.80 (0.59–1.07)                |
| Multivariable-adjusted <sup>a</sup> HR | 1.0 (ref) | 0.94 (0.83–1.07)                              | 0.97 (0.66–1.42)         | 0.80 (0.59–1.08)                |
| <b>Men</b>                             |           |                                               |                          |                                 |
| Crude HR                               | 1.0 (ref) | 0.82 (0.71–0.95)                              | 1.13 (0.74–1.71)         | 0.85 (0.61–1.20)                |
| Age-adjusted HR                        | 1.0 (ref) | 0.88 (0.77–1.02)                              | 1.13 (0.74–1.71)         | 0.81 (0.58–1.14)                |
| Multivariable-adjusted <sup>a</sup> HR | 1.0 (ref) | 0.89 (0.77–1.03)                              | 1.13 (0.74–1.73)         | 0.83 (0.59–1.17)                |
| <b>Women</b>                           |           |                                               |                          |                                 |
| Crude HR                               | 1.0 (ref) | 1.44 (1.13–1.84)                              | 0.84 (0.34–2.11)         | 1.09 (0.59–2.01)                |
| Age-adjusted HR                        | 1.0 (ref) | 1.00 (0.78–1.28)                              | 0.69 (0.28–1.73)         | 0.64 (0.34–1.19)                |
| Multivariable-adjusted <sup>a</sup> HR | 1.0 (ref) | 1.00 (0.78–1.29)                              | 0.53 (0.21–1.37)         | 0.65 (0.35–1.21)                |

BMI, body mass index; HR, hazard ratio.

<sup>a</sup>Adjusted for age, daily alcohol consumption, regular physical activity, smoking status, total cholesterol, and statin use.
