# Supplementary material for: Metabolic Dysfunction-Associated Fatty Liver Disease and Mortality: A Population-Based Cohort Study
Source: PubMed Central journal article supplement — Diabetes Metab J. 2023 Jan 12;47(2):220–31. doi: 10.4093/dmj.2021.0327 (PMC10040627; doi:10.4093/dmj.2021.0327), 2023-01-12
Supplement: dmj-2021-0327-Supplementary-Table-3.pdf [file dmj-2021-0327-Supplementary-Table-3.pdf]

**Supplementary Table 3.** The risk of cardiovascular death according to the component of metabolic dysfunction-associated fatty liver disease

| Variable                               | Normal    | Obesity<br>(BMI $\geq$ 23 kg/m <sup>2</sup> ) | Type 2 diabetes mellitus | Lean with metabolic dysfunction |
|----------------------------------------|-----------|-----------------------------------------------|--------------------------|---------------------------------|
| <b>All</b>                             |           |                                               |                          |                                 |
| Crude HR                               | 1.0 (ref) | 1.17 (0.85–1.60)                              | 1.08 (0.42–2.82)         | 1.58 (0.84–3.00)                |
| Age-adjusted HR                        | 1.0 (ref) | 1.17 (0.85–1.61)                              | 0.99 (0.38–2.57)         | 1.21 (0.64–2.28)                |
| Multivariable-adjusted <sup>a</sup> HR | 1.0 (ref) | 1.05 (0.76–1.44)                              | 0.99 (0.37–2.61)         | 1.21 (0.64–2.30)                |
| <b>Men</b>                             |           |                                               |                          |                                 |
| Crude HR                               | 1.0 (ref) | 0.95 (0.66–1.36)                              | 1.20 (0.41–3.52)         | 1.20 (0.56–2.57)                |
| Age-adjusted HR                        | 1.0 (ref) | 1.01 (0.70–1.44)                              | 1.20 (0.41–3.52)         | 1.15 (0.54–2.46)                |
| Multivariable-adjusted <sup>a</sup> HR | 1.0 (ref) | 0.93 (0.65–1.34)                              | 1.28 (0.43–3.80)         | 1.16 (0.54–2.50)                |
| <b>Women</b>                           |           |                                               |                          |                                 |
| Crude HR                               | 1.0 (ref) | 2.08 (1.07–4.07)                              | 0.68 (0.08–6.05)         | 2.13 (0.69–6.60)                |
| Age-adjusted HR                        | 1.0 (ref) | 1.26 (0.64–2.48)                              | 0.54 (0.06–4.83)         | 1.17 (0.37–3.71)                |
| Multivariable-adjusted <sup>a</sup> HR | 1.0 (ref) | 1.26 (0.64–2.49)                              | 0.44 (0.05–4.00)         | 1.18 (0.37–3.77)                |

BMI, body mass index; HR, hazard ratio.

<sup>a</sup>Adjusted for age, daily alcohol consumption, regular physical activity, smoking status, total cholesterol, and statin use.
